# Supplementary material for: Monothetic Genera are the Cast-Iron Building Blocks of Evolution
Source: Preprints.org preprint supplement (doi:10.20944/preprints202310.1653.v1), 2023-10-25
Supplement: Supplementary file 1 [file supplementary]

## Sheet: Sheet1
Spreadsheet for Likelihood Ratios or Bayes Factors for Interlocking Sequential Bayes Analysis. Richard H. Zander, Missouri Botanical Garden, Res Botanica Technical Report 2023-10-20. October 20, 2023.
p A>B	q B>A	formula fraction A>B	formula fraction B > A	L.R. or B.F.	Probability In a normalized distribution restricted to A>B and B>A where B is least different from A, and there are 4 descendant species
Total bits descendants plus any outgroup bits added to bits of each descendant	Here are negative bits for B > A, plus negative outgroup bits added to each descendant. Outgroup adds to descendants if A > B, adds a minus bits to B if B > A.	L.R. or B.F. = (2p / 1+2p )	((2-q ) / (1+2-q))	L.R. or B.F. = (2p / 1+2p ) / ((2-q ) / (1+2-q))
	Change only value below in yellow, which is negative
2	4	0.8	0.0588235	13.6	0.68
3	4	0.888889	0.0588235	15.1111	0.68
4	4	0.941176	0.0588235	16	0.68
5	4	0.969697	0.0588235	16.4848	0.68
6	4	0.984615	0.0588235	16.7385	0.68
7	4	0.992248	0.0588235	16.8682	0.68
8	4	0.996109	0.0588235	16.9339	0.68
9	4	0.998051	0.0588235	16.9669	0.68
10	4	0.999024	0.0588235	16.9834	0.68
11	4	0.999512	0.0588235	16.9917	0.68
12	4	0.999756	0.0588235	16.9959	0.68
13	4	0.999878	0.0588235	16.9979	0.68
14	4	0.999939	0.0588235	16.999	0.68
15	4	0.999969	0.0588235	16.9995	0.68
16	4	0.999985	0.0588235	16.9997	0.68
17	4	0.999992	0.0588235	16.9999	0.68
18	4	0.999996	0.0588235	16.9999	0.68
19	4	0.999998	0.0588235	17	0.68
20	4	0.999999	0.0588235	17	0.68
21	4	1	0.0588235	17	0.68
22	4	1	0.0588235	17	0.68
23	4	1	0.0588235	17	0.68
24	4	1	0.0588235	17	0.68
25	4	1	0.0588235	17	0.68
26	4	1	0.0588235	17	0.68
27	4	1	0.0588235	17	0.68
28	4	1	0.0588235	17	0.68
29	4	1	0.0588235	17	0.68
30	4	1	0.0588235	17	0.68
31	4	1	0.0588235	17	0.68
32	4	1	0.0588235	17	0.68
